# Supplementary material
Source: Springer Nature journal article supplement (https://www.springermedizin.de/resource/supplementary/12893_2010_169_MOESM2_ESM.pdf/9511710)

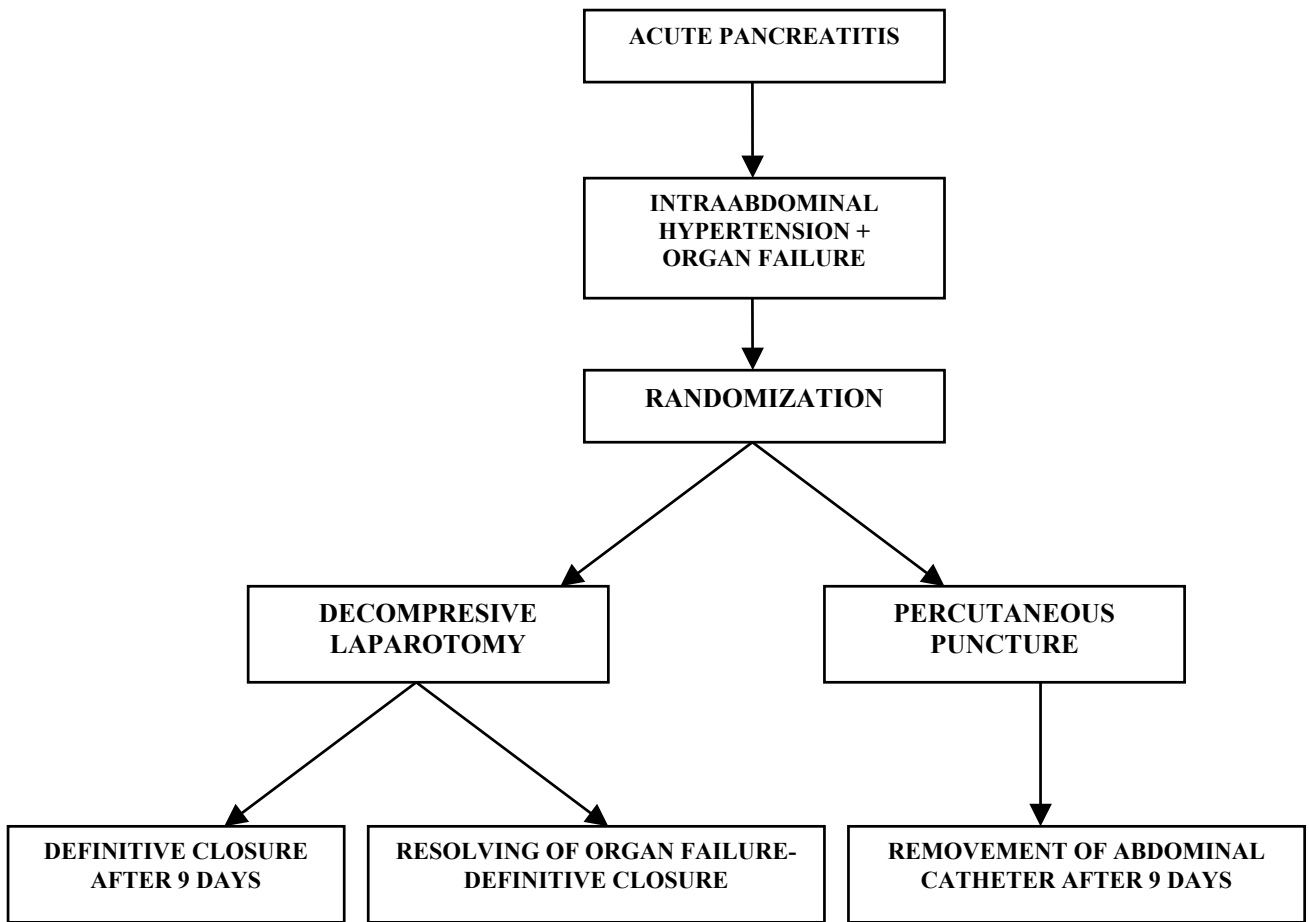

Supplement: MOESM2 [file 9511710]
